1                    **A metal-regulated AMPylation/deAMPylation switch in FIC proteins.**

2

3                    Simon Veyron<sup>1</sup>, Giulia Oliva<sup>2,3</sup>, Monica Rolando<sup>2,3</sup>, Carmen Buchrieser<sup>2,3</sup>,

4                                            Gérald Peyroche<sup>1</sup>, Jacqueline Cherfils<sup>1</sup>

5

6                    <sup>1</sup>Laboratoire de Biologie et Pharmacologie Appliquée, CNRS and Ecole normale supérieure

7                    Paris-Saclay, Cachan, France

8                    <sup>2</sup> Institut Pasteur, Biologie des Bactéries Intracellulaires, Paris, France

9                    <sup>3</sup> CNRS, UMR 3525, Paris, France

10

11                    Correspondence to :

12

13                    Jacqueline Cherfils

14                    Laboratoire de Biologie et Pharmacologie Appliquée,

15                    CNRS and Ecole normale supérieure Paris-Saclay,

16                    61 Avenue du Président Wilson

17                    94235 Cachan CEDEX, France

18                    [jacqueline.cherfils@ens-paris-saclay.fr](mailto:jacqueline.cherfils@ens-paris-saclay.fr)

19

20

21 **Abstract (250 words)**

22

23 FIC proteins regulate molecular processes in bacteria and animals by carrying out various  
24 post-translational modifications (PTM) of proteins by phosphate-containing compounds. The  
25 most frequent FIC-catalyzed PTM is the addition of AMP using ATP as a cofactor, a reaction  
26 coined AMPylation. In a large subgroup of FIC proteins, AMPylation is inhibited by a  
27 structurally conserved glutamate, but a diffusible signal able to relieve autoinhibition has not  
28 been identified. Here, we addressed this issue by studying two members of this subgroup, a  
29 single-domain FIC protein from the bacterial pathogen *Enterococcus faecalis* (EfFIC) and  
30 human HYPE/FicD, which is involved in the unfolded protein response in the endoplasmic  
31 reticulum. By combining structural and biochemical analysis, we find that EfFIC catalyzes  
32 both AMPylation and deAMPylation, and that both enzymatic activities are borne by the same  
33 active site. Remarkably, the conserved glutamate implements a multi-position metal switch,  
34 whereby different metals support or inhibit each of these reactions. As a result, the balance  
35 between the AMPylation and deAMPylation activities of EfFIC is controlled by the  
36  $Mg^{2+}/Ca^{2+}$  ratio, with  $Ca^{2+}$  favoring deAMPylation. Furthermore, we show that  
37 deAMPylation of the endoplasmic reticulum BIP chaperone by human FicD/HYPE is  
38 dependent on the  $Mg^{2+}/Ca^{2+}$  ratio, with high  $Ca^{2+}$  concentration impairing deAMPylation. Our  
39 findings suggest that the conserved glutamate is a signature of AMPylation/deAMPylation  
40 bifunctionality in FIC proteins. They also identify for the first time a diffusible signal that  
41 can rapidly modulate these opposing activities, which opens important perspectives for their  
42 functions in bacterial stress and human ER homeostasis.

43

44 **Significance statement (120 words)**

45

46 Many FIC proteins regulate target proteins by addition of AMP, a reaction coined  
47 AMPylation. In a large FIC proteins subgroup, AMPylation is autoinhibited by a conserved  
48 glutamate, but a diffusible activation signal has not been identified. Here we discover that the  
49 FIC protein from the pathogen *Enterococcus faecalis* catalyzes both AMPylation and  
50 deAMPylation and that its conserved glutamate implements a multi-position metal switch that  
51 controls the balance between these activities. Furthermore, we show that a metal,  $\text{Ca}^{2+}$ , also  
52 tunes deAMPylation of the BIP chaperone by the related human FicD/HYPE protein. These  
53 findings identify for the first time a diffusible signal that can rapidly tune FIC proteins, with  
54 important implications in bacterial stress and in the unfolded protein response in the ER.

55

56

## 57 **Introduction**

58

59 In less than a decade, FIC proteins have emerged as a large family of enzymes controlling the  
60 activity of target proteins by post-translationally modifying them with phosphate-containing  
61 compounds (reviewed in (1, 2, 3, 4)). These proteins are characterized by the presence of a  
62 conserved FIC domain, which carries out the post-translational modification (PTM) of a Tyr,  
63 Ser or Thr residue in a target protein (5, 6, 7, 8, 9, 10, 11). The most frequent PTM  
64 reaction catalyzed by FIC enzymes is the addition of AMP using ATP as a cofactor, coined  
65 AMPylation or adenylylation. This PTM activity was originally discovered in toxins from  
66 bacterial intracellular pathogens (12). It was later identified in bacterial toxin/antitoxins (e.g.  
67 (7)) and other bacterial FIC proteins of unknown functions (e.g. (11)), and in the only FIC  
68 protein found in metazoans, HYPE/FicD, which controls the reversible AMPylation of the  
69 BIP chaperone in the endoplasmic reticulum (ER) to match its activity to the load in unfolded  
70 proteins (13, 14, 15). A commonality of AMPylation and all other PTM reactions catalyzed  
71 by FIC proteins is that they use a motif of conserved sequence motif for catalysis, the FIC  
72 motif, which carries an invariant histidine that is critical for nucleophilic attack of the cofactor  
73 by the target residue, and an acidic residue (aspartate or glutamate) that binds an  $Mg^{2+}$  ion to  
74 stabilize the negative charges of the cofactor phosphates at the transition state (reviewed in (1,  
75 2, 3, 4)).

76

77 Given their role in controlling important bacterial and cellular responses, FIC-dependent PTM  
78 levels are expected to be precisely regulated. For instance, FIC toxin components of toxin-  
79 antitoxin modules are inhibited by obstruction of their active sites by their cognate antitoxin,  
80 and this strong inhibition is relieved by removal of the antitoxin (7, 9, 16). In a different  
81 strategy, addition of phosphocholine to cellular GTPases by *Legionella pneumophila* AnkX is  
82 reversed by another toxin, Lem3 (reviewed in (3)). Departing from these intermolecular  
83 mechanisms, an intriguing autoregulatory glutamate has been described in various  
84 AMPylating FIC proteins, which protrudes into the catalytic site from either N-terminal  
85 elements, as in human FicD (10), *Clostridium difficile* FIC (11) or *Shewanella oneidensis* FIC  
86 (17), or from a C-terminal  $\alpha$ -helix as in single-domain FIC proteins from *Neisseria*  
87 *meningitidis* (7) and *Helicobacter pylori* (PDB 2F6S). This glutamate superimposes with an  
88 inhibitory glutamate from the VbhA antitoxin that blocks the ATP-binding site in its cognate  
89 VbhT toxin (7), and its mutation into Ala or Gly has been consistently shown to increase  
90 AMPylation activities *in vitro* and in cells (reviewed in (18)). Furthermore, crystal structures

91 revealed that ATP binds to the active site of glutamate-containing FIC proteins in a manner  
92 where its  $\gamma$ -phosphate is not stabilized by interactions with the active site (7) and the  $\alpha$ - and  $\beta$ -  
93 phosphates are bound in a non-canonical conformation (11), while mutation of the glutamate  
94 creates space such that the  $\gamma$ -phosphate can interact with the FIC active site (7). These  
95 observations led to propose that this conserved glutamate implements autoinhibition by  
96 impairing the utilization of ATP as a donor for AMP, hence that it must be displaced to allow  
97 productive binding of ATP (7). In *N. meningitidis* FIC (NmFIC), activation has been proposed  
98 to occur upon changes in toxin concentration (19). In this scheme, NmFIC is in an inactive  
99 tetrameric state at high concentration, which is further stabilized by ATP, while its dilution  
100 promotes its conversion to a monomeric state, leading to activation by displacement of the  
101 inhibitory glutamate followed by auto-AMPylation that reinforce its activation (19).

102

103 However, diffusible signals able to control autoinhibition in glutamate-bearing AMPylating  
104 FIC proteins have not been identified. In addition, in a recent new twist, metazoan  
105 HYPE/FicD was shown to carry out deAMPylation as its primary enzymatic activity, and the  
106 conserved glutamate was found to be critical for this reaction (20). These intriguing  
107 observations challenge the model in which autoinhibition by the conserved glutamate would  
108 be the sole mode of regulation of glutamate-containing AMPylating FIC proteins. In this  
109 study, we addressed this question by combining structural and biochemical analysis of a  
110 single-domain FIC protein from *Enterococcus faecalis* (EfFIC). Enterococci are commensals  
111 of the gastrointestinal tract that become pathogenic outside of the gut and cause difficult-to-  
112 treat infections in the hospital due to acquisition and transmission of antibiotic resistance (21 ,  
113 22). We discover that EfFIC has both AMPylation and deAMPylation activities borne by the  
114 same active site. Furthermore, the conserved glutamate implements a metal switch that allows  
115 the  $Mg^{2+}/Ca^{2+}$  ratio to tune the balance between these activities. Finally, we show that the  
116 metal switch also exists in human FicD/HYPE, whose deAMPylation of the ER chaperone  
117 BIP is decreased at high  $Ca^{2+}/Mg^{2+}$  ratio. These findings identify for the first time a diffusible  
118 signal that can rapidly and reversibly modulate the activity of glutamate-bearing AMPylating  
119 FIC proteins, with important implications for signaling in bacteria and animals.

120

121

122 **Results.**

123

124 *Structural basis for EffIC AMPylation activity.*

125

126 *Enterococcus faecalis* FIC belongs to class III FIC proteins, which are comprised of a single  
127 FIC domain and carry an autoinhibitory glutamate in their C-terminal  $\alpha$ -helix. We determined  
128 crystal structures of unbound, phosphate-bound, AMP-bound and ATP $\gamma$ S-bound wild-type  
129 EffIC (EffIC<sup>WT</sup>) and of unbound and sulfate-bound EffIC carrying a mutation of the  
130 catalytic histidine into an alanine (EffIC<sup>H111A</sup>) (**Table 1 and Table S1**). These structures  
131 were obtained in different space groups, yielding 32 independent copies of the EffIC  
132 monomer in various environments in the crystal. All EffIC monomers resemble closely to  
133 each other and to structures of other class III FIC proteins (**Figure 1A**). Notably, the C-  
134 terminal  $\alpha$ -helix that bears the inhibitory glutamate shows no tendency for structural  
135 flexibility, even in subunits that are free of intersubunit contacts in the crystal. The glutamate  
136 has the same conformation as in other glutamate-bearing FIC protein structures (**Figure 1B**)  
137 and is stabilized by intramolecular interactions and interactions with the nucleotide cofactor,  
138 when present (**Figure 1C**). Two crystal structures were obtained in co-crystallization with a  
139 non-hydrolyzable ATP analog (ATP $\gamma$ S), for which well-defined electron density was  
140 observed for the ADP moiety (**Figure S1A**). The positions of the  $\alpha$  and  $\beta$  phosphates of  
141 ATP $\gamma$ S in these structures depart markedly from those seen in ATP bound unproductively to  
142 wild type NmFIC, in which only the ADP moiety is visible as in our structures (7), or bound  
143 non-canonically to CdFIC (11) (**Figure 1D**). In contrast, they superpose well to cofactors  
144 bound in a position competent for PTM transfer (7, 8) (**Figure 1E**). This observation  
145 prompted us to assess whether EffIC is competent for AMPylation, using autoAMPylation  
146 which is a convenient proxy when the physiological target is not known (reviewed in (18)).  
147 Using [ $\alpha$ -<sup>32</sup>P]-ATP and autoradiography to measure the formation of AMPylated EffIC  
148 (denoted <sup>AMP\*</sup>EffIC<sup>WT</sup>), we observe that EffIC<sup>WT</sup> has conspicuous autoAMPylation activity  
149 in the presence of Mg<sup>2+</sup> (**Figure 1F**). AMPylation is increased in EffIC<sup>E190G</sup>, in which the  
150 inhibitory glutamate is mutated into glycine, indicating that this activity is not optimal in  
151 EffIC<sup>WT</sup> (**Figure 1F**). We conclude from these experiments that wild-type EffIC has  
152 canonical features of an AMPylating FIC enzyme, and that the inhibitory glutamate mitigates  
153 this activity.

154

155 *EffIC is a deAMPylation in the presence of Ca<sup>2+</sup>*

156

157 To gain further insight into the activity of EffFIC, we solved the crystal structure of EffFIC  
158 bound to AMP (EffFIC<sup>WT</sup>-AMP) (**Table 1 and Table S1**). AMP superposes exactly to the  
159 AMP moiety of AMPylated CDC42 in complex with the FIC2 domain of the IbpA toxin (5)  
160 (**Figure 2A**). Electron-rich density was observed next to AMP in the active site,  
161 corresponding to a calcium ion present in the crystallization solution to the exclusion of all  
162 other metal ions (**Figure S1B**). Ca<sup>2+</sup> has 6 coordinations with distances in the expected 2.1-  
163 2.9 Å range, arranged with heptahedral geometry in which one ligand, which would be  
164 located opposite to one phosphate oxygen, is missing. It interacts with the phosphate of AMP,  
165 with the acidic residue in the FIC motif (Glu115), and with the inhibitory glutamate (Glu190)  
166 through a water molecule (**Figure 2B**). The position of Ca<sup>2+</sup> in the EffFIC<sup>WT</sup>-AMP structure  
167 differs from that of Mg<sup>2+</sup> observed in other FIC protein structures in complex with ATP  
168 (**Figure 2C**), raising the intriguing issue that Ca<sup>2+</sup> may play an alternative role in FIC  
169 functions. Inspired by the recent observation that animal HYPE/FicD proteins have  
170 deAMPylation enzymatic activity (20, 23), we analyzed whether EffFIC would have  
171 deAMPylation activity in the presence of Ca<sup>2+</sup>. Remarkably, the addition of Ca<sup>2+</sup> induced  
172 conspicuous deAMPylation of EffFIC<sup>WT</sup> that had been previously autoAMPylated in the  
173 presence of Mg<sup>2+</sup> and [ $\alpha$ -<sup>32</sup>P]-ATP (**Figure 2D**).

174

175 In the above setup, the AMPylation and deAMPylation activities are acting concurrently. To  
176 characterize the deAMPylation reaction selectively, the hyperactive EffFIC<sup>E190G</sup> mutant was  
177 autoAMPylated in the presence of Mg<sup>2+</sup>, purified to remove ATP, PPi and Mg<sup>2+</sup> such that no  
178 AMPylation remains possible, then its deAMPylation was triggered by addition of EffFIC<sup>WT</sup>  
179 or an EffFIC mutant and of Ca<sup>2+</sup>. The level of AMPylated EffFIC (denoted <sup>AMP-FAM</sup>EffFIC) was  
180 quantified by fluorescence using ATP-FAM, an ATP analog fluorescently labeled on the  
181 adenine base. Robust deAMPylation was observed upon addition of EffFIC<sup>WT</sup> and Ca<sup>2+</sup>  
182 (**Figure 2E**, EffFIC<sup>WT</sup> panel). No spontaneous deAMPylation of <sup>AMP-FAM</sup>EffFIC<sup>E190G</sup> was  
183 observed in the absence of EffFIC<sup>WT</sup> (**Figure 2E**, control panel), indicating that the  
184 deAMPylation reaction occurs in trans. We used this deAMPylation setup to identify residues  
185 critical for de-AMPylation (**Figure 2E**, mutant panels). Mutation of the catalytic histidine  
186 (H111A) and of the metal-binding acidic residue in the FIC motif (E115A) impaired  
187 deAMPylation of <sup>AMP-FAM</sup>EffFIC<sup>E190G</sup>. EffFIC<sup>E190G</sup>, which carries the mutation of the inhibitory  
188 glutamate, was also unable to promote deAMPylation, consistent with the absence of  
189 spontaneous deAMPylation in the assay. We conclude from these experiments that EffFIC is a



190 bifunctional enzyme, that AMPylation and deAMPylation are borne by the same active site,  
191 and that the inhibitory glutamate is involved in the deAMPylation reaction.

192

193 *The AMPylation and deAMPylation reactions are differentially regulated by metals.*

194

195 The above results raises the issue of the nature of signals able to exploit the bifunctional  
196 active site of EffFIC to regulate AMPylation/deAMPylation alternation. Previous work  
197 showed that AMPylation of *Escherichia coli* DNA gyrase by NmFIC, which shares 56%  
198 sequence identity with EffFIC, was highly sensitive to the toxin concentration, with a sharp  
199 drop of activity above 250  $\mu\text{M}$  (19). We used purified  $^{\text{AMP-FAM}}\text{EffFIC}^{\text{E190G}}$  to analyze whether  
200 the deAMPylation activity of  $\text{EffFIC}^{\text{WT}}$  would be similarly inhibited by increasing  
201 concentrations of  $\text{EffFIC}^{\text{WT}}$  (1-2000 nM). As shown in **Figure 3A**, deAMPylation increased  
202 with  $\text{EffFIC}^{\text{WT}}$  concentration, indicating that this reaction is not adversely affected by EffFIC  
203 concentration. Alternatively, the distinct electrochemical properties of  $\text{Ca}^{2+}$  and  $\text{Mg}^{2+}$   
204 (reviewed in (24)) may allow them support AMPylation and deAMPylation differentially.  
205 Remarkably,  $\text{Ca}^{2+}$  was unable to support AMPylation, contrary to  $\text{Mg}^{2+}$  (**Figure 3B**). In  
206 contrast, both  $\text{Mg}^{2+}$  and  $\text{Ca}^{2+}$  supported potent deAMPylation (**Figure 3C, left panel**).  
207 Importantly, mutation of the inhibitory glutamate eliminated the ability of EffFIC to use  $\text{Ca}^{2+}$   
208 for deAMPylation, while the mutant retained partial deAMPylation in the presence of  $\text{Mg}^{2+}$   
209 (**Figure 3C, right panel**). To understand how  $\text{Ca}^{2+}$  affects AMPylation and deAMPylation  
210 differentially, we determined the crystal structure of  $\text{EffFIC}^{\text{WT}}\text{-ATP}\gamma\text{S-Ca}^{2+}$ .  $\text{Ca}^{2+}$  is  
211 heptacoordinated to the  $\alpha$ - and  $\beta$ -phosphates of  $\text{ATP}\gamma\text{S}$ , of which only the ADP moiety is  
212 visible, to the inhibitory glutamate and to 4 water molecules (**Figure 3D**). In contrast, it does  
213 not form a direct or water-mediated interaction with the acidic residue in the FIC motif, which  
214 binds to  $\text{Mg}^{2+}$  in AMPylation competent structures {Engel, 2012 #33}. Remarkably, the  
215 position of  $\text{Ca}^{2+}$  is shifted with respect to that of  $\text{Mg}^{2+}$ , in a manner that  $\text{Mg}^{2+}$  and  $\text{Ca}^{2+}$  may  
216 compete with each other in AMPylation (**Figure 3E**). We tested this hypothesis by measuring  
217 the apparent AMPylation efficiency of  $\text{EffFIC}^{\text{WT}}$  at different  $\text{Mg}^{2+}/\text{Ca}^{2+}$  ratio. As shown in  
218 **Figure 3F**, AMPylation is prominent when  $\text{Mg}^{2+}$  exceeds  $\text{Ca}^{2+}$ , while  $\text{Ca}^{2+}$  in excess over  
219  $\text{Mg}^{2+}$  favors deAMPylation. We conclude from these experiments that AMPylation and  
220 deAMPylation efficiencies in EffFIC are regulated by a metal switch and that this regulatory  
221 mechanism is implemented by differential usage of the inhibitory glutamate and the acidic  
222 residue in the FIC motif for metal binding.

223



224 *DeAMPylation of the BIP chaperone by human FicD/HYPE is tuned by Ca<sup>2+</sup>*

225

226 DeAMPylation has been recently identified as the primary activity of human HYPE/FicD  
227 (20), which features a glutamate structurally equivalent to the inhibitory glutamate in EffIC  
228 (see **Figure 1B**, (10)) that is critical for deAMPylation of BIP (20). We analyzed whether, as  
229 observed in EffIC, Mg<sup>2+</sup> and Ca<sup>2+</sup> metals could also affect FicD/HYPE activity, using  
230 fluorescent ATP-FAM to monitor BIP AMPylation levels. No measurable AMPylation of BIP  
231 by HYPE<sup>WT</sup> was observed, neither with Mg<sup>2+</sup> nor Ca<sup>2+</sup>, although HYPE<sup>WT</sup> itself showed some  
232 level of autoAMPylation with both metals (**Figure 4A**). Alternatively, we used HYPE<sup>E234G</sup>,  
233 which carries the mutation of the conserved glutamate, to produce AMPylated BIP.  
234 Remarkably, while purified <sup>AMP-FAM</sup>BIP was efficiently deAMPyated by HYPE<sup>WT</sup> in the  
235 presence of Mg<sup>2+</sup>, no deAMPylation was measured in the presence of Ca<sup>2+</sup> (**Figure 4B**). To  
236 determine whether FicD/HYPE does not bind Ca<sup>2+</sup> or is unable to use it for deAMPylation,  
237 we carried out a Mg<sup>2+</sup>/Ca<sup>2+</sup> competition experiment in which HYPE<sup>WT</sup> and purified <sup>AMP-</sup>  
238 <sup>FAM</sup>BIP were incubated at increasing Ca<sup>2+</sup> concentration and a fixed Mg<sup>2+</sup> concentration. As  
239 shown in **Figure 4C**, deAMPylation efficiency decreased as the Ca<sup>2+</sup>/Mg<sup>2+</sup> ratio increased,  
240 suggesting that Ca<sup>2+</sup> inhibits deAMPylation by competing with Mg<sup>2+</sup>. We conclude from  
241 these experiments that Ca<sup>2+</sup> binds to FicD/HYPE in a catalytically incompetent manner,  
242 which allows it to tune the deAMPylation efficiency of FicD/HYPE towards the BIP  
243 chaperone.

244

## 245 **Discussion**

246

247 In this study, we sought after a diffusible signal able to regulate the large group of glutamate-  
248 bearing AMPylating FIC proteins. Combining structural and biochemical observations, we  
249 first show that bacterial EffIC is a bifunctional enzyme that encodes AMPylating and  
250 deAMPyating activities and that both reactions use the same active site. Next, we discover  
251 that the balance between these opposing activities is controlled by a metal switch, in which  
252 each reaction is differentially supported and inhibited by Mg<sup>2+</sup> and Ca<sup>2+</sup> in a manner that the  
253 Mg<sup>2+</sup>/Ca<sup>2+</sup> ratio determines the net AMPylation level. Furthermore, we identify the inhibitory  
254 glutamate and the acidic residue in the FIC motif as residues essential for the metal switch.  
255 Finally, we show that deAMPylation of the endoplasmic reticulum BIP chaperone by human

256 FicD/HYPE is also dependent on the  $\text{Ca}^{2+}/\text{Mg}^{2+}$  ratio, with high  $\text{Ca}^{2+}$  concentration impairing  
257 deAMPylation.

258

259 The identification of a potent deAMPylation activity in a bacterial FIC protein (this study)  
260 and in human FicD/HYPE (20), which depends on an equivalent glutamate in these otherwise  
261 remotely related FIC proteins, leads us to propose that the conserved glutamate is a signature  
262 of the ability of FIC proteins to catalyze both AMPylation and deAMPylation. Our data allow  
263 to delineate the catalytic basis for this bifunctionality, in which catalytic residues are shared  
264 by the AMPylation and deAMPylation reactions but have different roles in catalysis. In the  
265 AMPylation reaction, the invariant histidine in the FIC motif activates the acceptor hydroxyl  
266 of a target protein by attracting a proton and the acidic residue (Asp or Glu) in the FIC motif  
267 binds a metal that stabilizes the phosphates of the cofactor at the transition state (reviewed in  
268 (2, 3)). Based on the observations that the  $\alpha$ - and  $\beta$ -phosphates of ATP bind with canonical  
269 positions in wild-type EffIC and that AMPylation is potentiated by mutation of the glutamate  
270 in various FIC proteins, we propose that the primary role of the glutamate in AMPylation is to  
271 mitigate the efficiency of this reaction in the presence of  $\text{Mg}^{2+}$ , possibly to match AMPylation  
272 and deAMPylation efficiencies. In the deAMPylation mechanism depicted in **Figure 5** (see  
273 also discussion in **Supplementary data and Figure S2**), the conserved glutamate activates a  
274 water molecule for nucleophilic attack of the phosphorus, and the invariant histidine generates  
275 the free hydroxyl group in the protein residue by giving up a proton, as also proposed in (20).  
276 In addition, both the acidic residue of the FIC motif and the conserved glutamate contribute to  
277 binding a catalytic metal, which stabilizes the phosphate of the AMP moiety at the transition  
278 state. A remarkable feature in the above bifunctional mechanism is that both reactions can be  
279 adversely regulated by a second metal that competes with the catalytic metal. In EffIC, we  
280 observed that  $\text{Ca}^{2+}$  binds to ATP in a shifted position with respect to the canonical  
281 AMPylation  $\text{Mg}^{2+}$ -binding site, resulting in decreased AMPylation. In a similar scenario,  $\text{Ca}^{2+}$   
282 competes with  $\text{Mg}^{2+}$  in the deAMPylation reaction catalyzed by FicD/HYPE, thereby  
283 decreasing deAMPylation. This multi-position metal switch constitutes a new paradigm in  
284 bifunctional enzyme regulation, in which the relative affinities of specific metals for the  
285 AMPylation and deAMPylation configurations tip the balance towards opposing activities  
286 within the same active site. Future studies are now needed to determine the bifunctionality  
287 spectrum of glutamate-bearing FIC proteins resulting from variations in metal specificities  
288 and affinities. Likewise, the observation by us and others that FicD/HYPE has distinct  
289 AMPylation and deAMPylation patterns towards itself and BIP suggests that the protein

290 substrate influences the AMPylation/deAMPylation balance through mechanisms that are  
291 currently unknown. Finally, how other levels of regulation, such as autoAMPylation and  
292 changes in oligomerization that have been described for a close homolog of EfFIC (19),  
293 combine with the intrinsic metal switch identified in this study will have to be investigated.

294

295 Together, our findings identify for the first time a diffusible signal that can modulate the  
296 activity of glutamate-containing bacterial FIC proteins. This raises the issue of physiological  
297 conditions that can lead to a sharp variation of  $\text{Ca}^{2+}$  (or possibly another metal) levels in  
298 bacteria resulting in an AMPylation/deAMPylation switch. Bacterial FIC proteins are present  
299 in a large number of bacteria with unrelated lifestyles, where they must respond to specific  
300 stress situations. Although speculative at that stage, one such situation could thus be related to  
301 antimicrobial chemicals and peptides, which bacteria produce in vast variety for ecological  
302 competition purposes, some of which disrupt the integrity of the bacterial wall (reviewed in  
303 (25)). Because bacteria normally contain a low concentration of  $\text{Ca}^{2+}$ , increase of intracellular  
304  $\text{Ca}^{2+}$  following leakage of the bacterial cell wall could be equated to a danger signal, calling  
305 for a defense response mediated by FIC proteins. How individual bacteria exploit the  
306 bifunctionality of their FIC proteins in their ecological niche or in infections will be an  
307 important issue to address in future studies.

308

309 Our observation that deAMPylation of the BIP chaperone by human HYPE is intrinsically  
310 sensitive to the  $\text{Mg}^{2+}/\text{Ca}^{2+}$  ratio, with  $\text{Ca}^{2+}$  restraining deAMPylation, suggests an appealing  
311 hypothesis for the regulation of FicD/HYPE in endoplasmic reticulum (ER) functions.  
312 Recently, FicD/HYPE has been demonstrated to stimulate the activity of the BIP chaperone in  
313 response to an increase in the unfolded protein load (13-15, 23), and this relies on its  
314 deAMPylation of BIP (20).  $\text{Ca}^{2+}$  is a fast and efficient messenger that is critical for ER  
315 homeostasis, where its depletion swiftly alters protein folding processes and activates the  
316 unfolded protein response (reviewed in (26, 27)). It is thus tempting to speculate that  
317 inhibition of FicD/HYPE deAMPylation at high  $\text{Ca}^{2+}$ , which we observe *in vitro*, reflects its  
318 inhibition under ER homeostasis, where  $\text{Ca}^{2+}$  concentration is high and BIP activity is not  
319 required. Conversely, depletion of  $\text{Ca}^{2+}$  induces ER stress and triggers the UPR. Depletion of  
320  $\text{Ca}^{2+}$  may thus release inhibition of FicD/HYPE, leading to efficient deAMPylation of BIP  
321 and up-regulation of its activity, which is a key feature of the UPR. In this model,  
322 FicD/HYPE functions as an integrator between  $\text{Ca}^{2+}$  homeostasis in the ER and the BIP-  
323 mediated unfolded protein response.

324

325 In conclusion, we have identified a diffusable and rapidly tunable signal that can modulate the  
326 intrinsic enzymatic activity of glutamate-bearing FIC proteins and tip the balance between  
327 AMPylation and deAMPylation reactions, with major implications in bacterial and human  
328 physiology and a potential impact in infections and ER diseases. Future studies are now  
329 needed to investigate how the metal switch of glutamate-bearing FIC protein activities is  
330 exploited in bacterial stress, and, in the case of animal FiD/HYPE, its role in the unfolded  
331 protein response and its crosstalks with  $\text{Ca}^{2+}$ -controlled processes in the ER.

332

333 **Figure Legends**

334

335 **Figure 1 : Structural basis for the AMPylation activity of EffFIC**

336 A : Structure of the EffFIC monomer showing the FIC motif (pink), the C-terminal  $\alpha$ -helix  
337 bearing the inhibitory glutamate (orange) and the  $\beta$ -hairpin predicted to bind protein  
338 substrates (cyan). The ADP moiety of ATP $\gamma$ S is shown in sticks.

339 B : The inhibitory glutamate from EffFIC<sup>WT</sup> (orange) is structurally equivalent to the  
340 glutamate found in the C-terminus of NmFIC ((7), PDB 2G03) and in the N-terminus of  
341 *Bacteroides* BtFIC (PDB 3CUC), *Clostridium* CdFIC ((11), PDB 4X2E) and of human  
342 FicD/HYPE ((10), PDB 4U04). Superpositions are done on the structurally highly conserved  
343 FIC motif.

344 C : Interactions of the inhibitory glutamate with the active site of ATP $\gamma$ S-bound EffFIC<sup>WT</sup>.  
345 Hydrogen bonds are depicted by dotted lines.

346 D : The positions of the  $\alpha$ - and  $\beta$ -phosphates of ATP $\gamma$ S bound to EffFIC<sup>WT</sup> (yellow) diverge  
347 from those of ATP $\gamma$ S bound to NmFIC<sup>WT</sup> (cyan, (7), PDB 3S6A) and of ATP bound to CdFIC  
348 (blue, (11), S31A/E35A mutant, PDB 4X2D) in a non-canonical conformations. Note that  
349 only the ADP moiety of ATP $\gamma$ S is visible in the EffFIC<sup>WT</sup> and NmFIC<sup>WT</sup> crystal structures.

350 E : The  $\alpha$ - and  $\beta$ -phosphates of ATP $\gamma$ S bound to EffFIC<sup>WT</sup> (yellow) superpose well to those of  
351 ATP bound to NmFIC (purple, (7), E186G mutant, PDB 3ZLM) and of CDP-choline bound  
352 to AnkX (green, (8), H229A mutant, PDB 4BET) in a PTM-competent conformation.

353 F : AutoAMPylation of EffFIC<sup>WT</sup> and EffFIC<sup>E190G</sup>. The level of AMPylated proteins (indicated  
354 as <sup>AMP\*</sup>EffFIC<sup>WT</sup>) was measured by autoradiography using radioactive [ $\alpha$ -<sup>32</sup>P]-ATP in the  
355 presence of 100 nM Mg<sup>2+</sup>. The reaction was carried out for one hour for EffFIC<sup>WT</sup> and five  
356 minutes for EffFIC<sup>E190G</sup>. The total amount of EffFIC<sup>WT</sup> measured by Coomassie staining in the  
357 same sample is shown.

358

359 **Figure 2 : EffFIC is a deAMPylator in the presence of Ca<sup>2+</sup>**

360 A : AMP bound to EffFIC<sup>WT</sup> superposes with the AMP moiety of AMPylated CDC42 in  
361 complex with the FIC protein IbpA ((5), PDB 4ITR). Superposition was carried out based on  
362 the FIC motif.

363 B : Close-up view of Ca<sup>2+</sup> bound to EffFIC<sup>WT</sup>-AMP. The incomplete heptagonal coordination  
364 sphere of Ca<sup>2+</sup> is indicated by dotted lines. Water molecules are shown as red spheres.

365 C:  $\text{Ca}^{2+}$  bound to  $\text{EffIC}^{\text{WT}}\text{-AMP}$  is shifted with respect to  $\text{Mg}^{2+}$  bound to  $\text{NmFIC}^{\text{E/G}}\text{-}$   
366  $\text{AMPPNP}$ . The superposition is done on the FIC motif.

367 D:  $\text{EffIC}^{\text{WT}}$  has deAMPylation activity in the presence of  $\text{Ca}^{2+}$ .  $\text{EffIC}^{\text{WT}}$  was  
368 autoAMPylated in the presence  $0.1 \mu\text{M Mg}^{2+}$  for one hour, then the sample was incubated for  
369 60 minutes with EDTA alone (1mM) (lane 1) or 5, 30 and 60 minutes with EDTA (1mM) and  
370 an excess of  $\text{Ca}^{2+}$  (10 mM) (lanes 2-4). AMPylation levels were analyzed by autoradiography  
371 using  $[\alpha\text{-}^{32}\text{P}]\text{-ATP}$ . The total amount of  $\text{EffIC}^{\text{WT}}$  measured by Coomassie staining in the  
372 same sample is shown.

373 E: Key residues of the AMPylation active site are required for deAMPylation.  $\text{EffIC}^{\text{E190G}}$   
374 was auto-AMPylated for one hour in the presence of fluorescently-labeled  $\text{ATP-FAM}$  and  
375  $\text{Mg}^{2+}$ , then  $^{\text{AMP-FAM}}\text{EffIC}^{\text{E190G}}$  was purified to remove  $\text{Mg}^{2+}$ ,  $\text{PPi}$  and  $\text{ATP-FAM}$ .  
376 DeAMPylation was then triggered by addition of wild-type or mutant  $\text{EffIC}$  as indicated in  
377 the presence or not of 1mM  $\text{Ca}^{2+}$ . AMPylation levels (indicated as  $^{\text{AMP-FAM}}\text{EffIC}^{\text{E190G}}$ ) after  
378 one hour incubation were analyzed by fluorescence. The total amount of  $\text{EffIC}$  proteins  
379 (indicated as  $\text{EffIC}^{\text{total}}$ ) measured by Coomassie staining in the same sample is shown.

380

381 **Figure 3 : The  $\text{Mg}^{2+}/\text{Ca}^{2+}$  ratio tunes the balance between  $\text{EffIC}$  AMPylation and de-**  
382 **AMPylation**

383 A: DeAMPylation is not inhibited at high  $\text{EffIC}$  concentration. Purified  $^{\text{AMP-FAM}}\text{EffIC}^{\text{E190G}}$   
384 was incubated with increasing concentrations of  $\text{EffIC}^{\text{WT}}$  for one hour in the presence of  
385  $100\mu\text{M Ca}^{2+}$ . AMPylation levels were measured by fluorescence as in **Figure 2D**.

386 B:  $\text{EffIC}^{\text{WT}}$  uses  $\text{Mg}^{2+}$  but not  $\text{Ca}^{2+}$  for autoAMPylation. AutoAMPylation was carried out at  
387 1mM  $\text{Ca}^{2+}$  or  $\text{Mg}^{2+}$  for one hour and was measured by autoradiography as in **Figure 1F**.

388 C: The conserved glutamate of  $\text{EffIC}$  is required for the usage of both  $\text{Mg}^{2+}$  and  $\text{Ca}^{2+}$  for  
389 deAMPylation. Experiments were carried out for one hour as in **Figure 3A** in the presence of  
390  $0.5\text{mM EDTA}$  and  $3\text{mM}$  of  $\text{Mg}^{2+}$  or  $\text{Ca}^{2+}$ . Quantification of deAMPylation efficiencies is  
391 shown on the right panel.

392 D: Close-up view of  $\text{Ca}^{2+}$  bound to  $\text{EffIC}^{\text{WT}}\text{-ATP}\gamma\text{S}$ . The heptagonal coordination sphere of  
393  $\text{Ca}^{2+}$  is indicated by dotted lines. Water molecules are shown as red spheres.

394 E:  $\text{Ca}^{2+}$  bound to  $\text{EffIC}^{\text{WT}}\text{-ATP}\gamma\text{S}$  is shifted with respect to  $\text{Mg}^{2+}$  bound to AMPylation-  
395 competent  $\text{NmFIC}^{\text{E/G}}\text{-AMPPNP}$ .

396 F: The net AMPylation efficiency of  $\text{EffIC}^{\text{WT}}$  is controlled by the  $\text{Mg}^{2+}/\text{Ca}^{2+}$  ratio. Auto-  
397 AMPylation of  $\text{EffIC}^{\text{WT}}$  was carried out for one hour at fixed  $\text{Mg}^{2+}$  concentration (1mM) and

398  $\text{Ca}^{2+}$  concentrations ranging from 0 to 5.0 mM.  $^{\text{AMP-FAM}}$ EffFIC levels were measured by  
399 fluorescence. DeAMPylation levels are expressed as the percentage of the maximal  
400 AMPylation level obtained with  $\text{Mg}^{2+}$  alone. All measurements have p-values  $<0.05$  with  
401 respect to the experiment containing  $\text{Mg}^{2+}$  alone. The total amount of EffFIC<sup>WT</sup> measured by  
402 Coomassie staining in each sample is shown.

403

404 **Figure 4: DeAMPylation of BIP by FicD/HYPE requires  $\text{Mg}^{2+}$  and is inhibited by  $\text{Ca}^{2+}$ .**

405 A: HYPE<sup>WT</sup> does not AMPylate the BIP chaperone. Reactions were carried for one hour in  
406 presence of 1mM  $\text{Mg}^{2+}$  or 1mM  $\text{Ca}^{2+}$ . The level of AMPylated proteins (indicated as  $^{\text{AMP-FAM}}$   
407  $^{\text{FAM}}$ HYPE<sup>WT</sup> and  $^{\text{AMP-FAM}}$ BIP) was measured by fluorescence. The total amount of proteins  
408 measured by Coomassie staining in the same sample is shown.

409 B:  $\text{Ca}^{2+}$  inhibits deAMPylation of BIP by HYPE<sup>WT</sup>. BIP was first AMPylated for one hour by  
410 the hyperactive HYPE<sup>E234G</sup> mutant in the presence of 100  $\mu\text{M}$   $\text{Mg}^{2+}$ , then  $^{\text{AMP-FAM}}$ BIP was  
411 purified to remove  $\text{Mg}^{2+}$ , PPi and ATP-FAM. DeAMPylation of  $^{\text{AMP-FAM}}$ BIP was then  
412 triggered by addition of wild-type or mutant HYPE as indicated in the presence of 1mM  $\text{Mg}^{2+}$   
413 or 1mM  $\text{Ca}^{2+}$ .  $^{\text{AMP-FAM}}$ BIP levels were measured by fluorescence. The total amount of BIP  
414 measured by Coomassie staining in each sample is shown.

415 C: The net deAMPylation efficiency of HYPE<sup>WT</sup> is tuned by the  $\text{Mg}^{2+}/\text{Ca}^{2+}$  ratio.  
416 DeAMPylation was carried out as in **Figure 4B** using a fixed  $\text{Mg}^{2+}$  concentration (200 $\mu\text{M}$ )  
417 and 0, 1, 2 or 3mM  $\text{Ca}^{2+}$ . AMPylation levels were measured by fluorescence, normalized to  
418 the fluorescence intensity of HYPE and expressed as the percentage of maximal  
419 deAMPylation level obtained in the absence of  $\text{Ca}^{2+}$ . All data have p-values  $<0.05$  with  
420 respect to the control in the absence of  $\text{Ca}^{2+}$ . The total amount of BIP measured by Coomassie  
421 staining in each sample is shown.

422

423 **Figure 5: Model of the  $\text{Ca}^{2+}$ -assisted deAMPylation catalytic mechanism.**

424 In this model, the regulatory glutamate (Glu190 in EffFIC) attracts a proton from a water  
425 molecule coordinating the metallic cation (1) to activate it for nucleophilic attack of its  
426 oxygen on the phosphorus of AMP moiety in the AMPylated substrate (2). The positive  
427 charge provided by  $\text{Ca}^{2+}$  increases electrophilicity of the phosphorus and stabilizes the  
428 negative charge of the intermediate (2 and 3). The intermediate harboring a pentavalent  
429 phosphorus then rearranges, leading to the breaking of the phosphor-ester bond, which is  
430 elicited by the capture of a proton provided by the catalytic histidine (4). R : AMPylated  
431 protein



432 **Material and Methods.**

433

434 *Protein cloning, expression and purification*

435

436 The codon-optimized gene encoding full-length *Enterococcus faecalis* EffIC with an N-  
437 terminal 6-histidine tag was from GeneArt Gene Synthesis (ThermoFisher Scientific) and  
438 cloned into a pET22b(+) vector. The codon-optimized gene encoding human FicD/HYPE  
439 (residues 45-459) carrying an N-terminal 6-His tag followed by SUMO tag was from GeneArt  
440 Gene Synthesis and cloned into a pET151/D-TOPO vector (ThermoFisher Scientific). All  
441 mutations were performed with the QuickChange II mutagenesis kit (Agilent). *Mus musculus*  
442 BIP in pUJ4 plasmid is a kind gift from Ronald Melki (CNRS, Gif-sur-Yvette). All constructs  
443 were verified by sequencing (GATC). All EffIC constructs were expressed in *E. coli* BL21  
444 (DE3) pLysS in LB medium. Overexpression was induced overnight with 0.5 mM IPTG at  
445 20°C. Bacterial cultures were centrifuged for 40 min at 4000g. Bacterial pellets were  
446 resuspended in lysis buffer (50 mM Tris-HCl pH 8.0, 150 mM NaCl, 5% glycerol,  
447 0.25 mg/mL lysozyme) containing a protease inhibitor cocktail, disrupted at 125 psi using a  
448 high pressure cell disrupter and centrifuged 30 min at 22000g. The cleared lysate supernatant  
449 was loaded on a Ni-NTA affinity chromatography column (HisTrap FF, GE Healthcare) and  
450 eluted with 250 mM imidazole. Purification was polished by gel filtration on a Superdex 200  
451 16/600 column (GE Healthcare) equilibrated with storage buffer (50 mM Tris-HCl pH 8.0,  
452 150 mM NaCl). Wild-type and mutant FicD/HYPE were purified as EffIC, except that the  
453 lysis buffer was complemented with 1mM DTT and 0.02% Triton X-100 and other buffers  
454 with 1mM DTT. To remove the SUMO tag, FicD/HYPE was incubated with SUMO protease  
455 (ThermoFischer) at 1/100 weight/weight ratio during 1 hour at room temperature. The cleaved  
456 fraction was separated by affinity chromatography (HisTrap FF, GE Healthcare) and further  
457 purified by gel filtration on a Superdex 200 10/300 column (GE Healthcare) equilibrated with  
458 storage buffer (50 mM Tris pH 8.0, 150 mM NaCl, 1mM DTT, 5% glycerol). Mouse BIP was  
459 purified as EffIC.

460

461 *Crystallization and structure determination*

462

463 A summary of the crystal structures determined in this study is in **Table 1**. Proteins were  
464 crystallized using a TTP Labtech's Mosquito LCP crystallization robot and crystallization  
465 screens (Jena Bioscience and Quiagen). Conditions leading to crystals were subsequently

466 optimized. Diffraction data sets were recorded at synchrotron SOLEIL and ESRF. Datasets  
467 were processed using XDS (28), xdsme (<https://github.com/legrandp/xdsme>) or autoProc (29).  
468 Structures were solved by molecular replacement and refined with the Phenix suite (30) or  
469 Buster (Bricogne G., Blanc E., Brandl M., Flensburg C., Keller P., Paciorek W., Roversi P,  
470 Sharff A., Smart O.S., Vornrhein C., Womack T.O. (2017). BUSTER version 2.10.2.  
471 Cambridge, United Kingdom: Global Phasing Ltd.). Models were build using Coot (31).  
472 Softwares used in this project were curated by SBGrid (32). Crystallization conditions, data  
473 collection statistics and refinement statistics are given in **Table S1**. All structures have been  
474 deposited with the Protein Data Bank (PDB codes in **Table S1**).

475

#### 476 *AMPylation and deAMPylation assays*

477

478 AMPylation and deAMPylation autoradiography assays were carried out using the following  
479 protocols. For AMPylation reactions, 8  $\mu\text{g}$  of purified proteins were mixed with 10  $\mu\text{Ci}$  [ $\alpha$ -  
480  $^{32}\text{P}$ ] ATP (Perkin Elmer) in a buffer containing 50mM Tris-HCl pH 7.4, 150 mM NaCl and  
481 0.1 mM  $\text{MgCl}_2$ . Reactions were incubated for 1 h at 30 °C, then stopped with reducing SDS  
482 sample buffer and boiling for 5 min. For deAMPylation, proteins were allowed to AMPylate  
483 as above for 1 h, then 1 mM EDTA was added with or without 10 mM  $\text{CaCl}_2$ . Proteins were  
484 resolved by SDS-PAGE and AMPylation was revealed by autoradiography.

485 EffFIC AMPylation and deAMPylation fluorescence assays were carried out using the  
486 following protocols. AMPylation was carried out using a fluorescent ATP analog modified by  
487  $\text{N}^6$ -(6-Amino)hexyl on the adenine base (ATP-FAM, Jena Bioscience). AMPylated proteins  
488 were obtained by incubation for one hour at 30 °C in 50mM Tris pH 8.0, 150 mM NaCl,  
489 0.1 mM  $\text{MgCl}_2$  and an equimolar amount of ATP-FAM. Before deAMPylation reactions, the  
490 buffer was exchanged to 50 mM Tris-HCl pH 8.0 and 150 mM NaCl by 5 cycles of  
491 dilution/concentration on a Vivaspinn-500 with a cut-off of 10kDa (Sartorius), resulting in a  
492 final dilution of ATP-FAM,  $\text{MgCl}_2$  and  $\text{PPi}$  by about  $10^5$  times. DeAMPylation reactions  
493 were carried out using 2  $\mu\text{g}$  of AMPylated protein and 4  $\mu\text{g}$  of freshly purified EffFIC proteins  
494 in a buffer containing 50mM Tris-HCl pH 8.0 and 150 mM NaCl, for 1h at 30°C. Reactions  
495 were stopped by addition of reducing SDS sample buffer and boiling for 5 min. Proteins were  
496 resolved by SDS-PAGE and modification by AMP-FAM was revealed by fluorescence using  
497 green channel (excitation: 488 nm, emission: 526 nm) on a Chemidoc XR+ Imaging System  
498 (BioRad).

499 HYPE AMPylation and deAMPylation fluorescence assays were carried out using the

500 following protocols. AMPylation was carried out using fluorescent ATP-FAM. AMPylated  
501 BIP was obtained by incubation for one hour at 30 °C in 50mM Tris pH 8.0, 150 mM NaCl,  
502 0.1 mM MgCl<sub>2</sub>, 2μM HYPE<sup>E234G</sup> and an equimolar amount of ATP-FAM. Before  
503 deAMPylation reactions, the buffer was exchanged with 50mM Tris-HCl pH 8.0 and 150 mM  
504 NaCl by 5 cycles of dilution/concentration on a Vivaspin-500 with a cut-off of 50kDa  
505 (Sartorius), resulting in a final dilution of ATP-FAM, MgCl<sub>2</sub> and PPi produced by the  
506 reaction of about 10<sup>5</sup> times. DeAMPylation reactions were carried using 2 μg of AMPylated  
507 protein and 4 μg of freshly purified HYPE<sup>WT</sup> in a buffer containing 50mM Tris pH 8.0 and  
508 150 mM NaCl, for 1h at 30°C. Reactions were stopped and ATP-FAM modification revealed  
509 as EffIC. Quantification of AMP-FAM levels was done using (ImageLab, BioRad).  
510 All experiments were done at least in triplicate, except kinetics in Figure 3A that were done in  
511 duplicate.

512

### 513 **Acknowledgements.**

514

515 This work was supported by grants from the Fondation pour la Recherche Médicale and from  
516 the Agence Nationale pour la Recherche to J.C. and by grants n°ANR-10-LABX-62-IBEID  
517 and from the Fondation pour la Recherche Médicale to C.B. S.V. was supported by a PhD  
518 grant from the DIM MALINF and G.O. by a stipend from the Pasteur-Paris University  
519 International PhD program. We are grateful to the scientific teams at the PX1 and PX2  
520 beamlines at the SOLEIL synchrotron (Gif-sur-Yvette, France) and from the ID29, ID30-A3  
521 and ID30B beamlines at the European Synchrotron Research Facility (ESRF, Grenoble,  
522 France) for their expertise and advice. We thank Pascale Serror (INRA, Jouy-en-Josas,  
523 France) and Philippe Glaser (Institut Pasteur) for discussions and the members of the Cherfils  
524 lab for help and shared expertise.

525

526 **Table 1 – Summary of crystal structures of EffIC determined in this study.** All crystals  
527 have cell angles of  $\alpha$ ,  $\beta$  and  $\gamma = 90^\circ$ . Crystallographic statistics are given in **Table S1**. \* : only  
528 the ADP moiety is visible.

| Form  | Space group                      | Cell parameters<br><i>a, b, c</i> (Å) | Ligand                             | Resolution | PDB  |
|-------|----------------------------------|---------------------------------------|------------------------------------|------------|------|
| WT    | P4 <sub>1</sub> 2 <sub>1</sub> 2 | 65.13, 65.13, 248.06                  | PO <sub>4</sub> <sup>2-</sup>      | 2.29       | 6ER8 |
| WT    | I222                             | 121.54, 131.00, 136.94                | /                                  | 2.40       | 5NV5 |
| WT    | P4 <sub>1</sub> 2 <sub>1</sub> 2 | 64.98 64.98 246.24                    | AMP – Ca <sup>2+</sup>             | 2.35       | 6EP0 |
| WT    | P4 <sub>3</sub> 2 <sub>1</sub> 2 | 125.35 125.35 362.8                   | ATP $\gamma$ S* – Ca <sup>2+</sup> | 2.15       | 6EP2 |
| WT    | P4 <sub>3</sub> 2 <sub>1</sub> 2 | 87.84 87.84 364.94                    | ATP $\gamma$ S*                    | 1.93       | 6EP5 |
| H118A | P2 <sub>1</sub> 22 <sub>1</sub>  | 76.67 77.11 103.15                    | /                                  | 2.60       | 5NWF |
| H118A | I222                             | 121.93 131.16 136.71                  | SO <sub>4</sub> <sup>2-</sup>      | 2.20       | 5NVQ |

529

530

531 **References**

532

- 533 1. Kinch LN, Yarbrough ML, Orth K, & Grishin NV (2009) Fido, a novel AMPylation  
534 domain common to fic, doc, and AvrB. *PloS one* 4(6):e5818.
- 535 2. Garcia-Pino A, Zenkin N, & Loris R (2014) The many faces of Fic: structural and  
536 functional aspects of Fic enzymes. *Trends in biochemical sciences* 39(3):121-129.
- 537 3. Roy CR & Cherfils J (2015) Structure and function of Fic proteins. *Nat Rev Microbiol*  
538 13(10):631-640.
- 539 4. Harms A, Stanger FV, & Dehio C (2016) Biological Diversity and Molecular  
540 Plasticity of FIC Domain Proteins. *Annu Rev Microbiol* 70:341-360.
- 541 5. Xiao J, Worby CA, Mattoo S, Sankaran B, & Dixon JE (2010) Structural basis of Fic-  
542 mediated adenylylation. *Nat Struct Mol Biol* 17(8):1004-1010.
- 543 6. Luong P, *et al.* (2010) Kinetic and structural insights into the mechanism of  
544 AMPylation by VopS Fic domain. *The Journal of biological chemistry*  
545 285(26):20155-20163.
- 546 7. Engel P, *et al.* (2012) Adenylylation control by intra- or intermolecular active-site  
547 obstruction in Fic proteins. *Nature* 482(7383):107-110.
- 548 8. Campanacci V, Mukherjee S, Roy CR, & Cherfils J (2013) Structure of the Legionella  
549 effector AnkX reveals the mechanism of phosphocholine transfer by the FIC domain.  
550 *The EMBO journal* 32(10):1469-1477.
- 551 9. Castro-Roa D, *et al.* (2013) The Fic protein Doc uses an inverted substrate to  
552 phosphorylate and inactivate EF-Tu. *Nature chemical biology* 9(12):811-817.
- 553 10. Bunney TD, *et al.* (2014) Crystal structure of the human, FIC-domain containing  
554 protein HYPE and implications for its functions. *Structure* 22(12):1831-1843.
- 555 11. Dedic E, *et al.* (2016) A Novel Fic (Filamentation Induced by cAMP) Protein from  
556 *Clostridium difficile* Reveals an Inhibitory Motif-independent  
557 Adenylylation/AMPylation Mechanism. *The Journal of biological chemistry*  
558 291(25):13286-13300.
- 559 12. Yarbrough ML, *et al.* (2009) AMPylation of Rho GTPases by Vibrio VopS disrupts  
560 effector binding and downstream signaling. *Science* 323(5911):269-272.
- 561 13. Sanyal A, *et al.* (2015) A novel link between Fic (filamentation induced by cAMP)-  
562 mediated adenylylation/AMPylation and the unfolded protein response. *The Journal of*  
563 *biological chemistry* 290(13):8482-8499.

- 564 14. Ham H, *et al.* (2014) Unfolded protein response-regulated *Drosophila* Fic (dFic)  
565 protein reversibly AMPylates BiP chaperone during endoplasmic reticulum  
566 homeostasis. *The Journal of biological chemistry* 289(52):36059-36069.
- 567 15. Preissler S, *et al.* (2015) AMPylation matches BiP activity to client protein load in the  
568 endoplasmic reticulum. *Elife* 4:e12621.
- 569 16. Stanger FV, Harms A, Dehio C, & Schirmer T (2016) Crystal Structure of the  
570 *Escherichia coli* Fic Toxin-Like Protein in Complex with Its Cognate Antitoxin. *PLoS*  
571 *one* 11(9):e0163654.
- 572 17. Das D, *et al.* (2009) Crystal structure of the Fic (Filamentation induced by cAMP)  
573 family protein SO4266 (gi|24375750) from *Shewanella oneidensis* MR-1 at 1.6 Å  
574 resolution. *Proteins* 75(1):264-271.
- 575 18. Veyron S, Peyroche G, & Cherfils J (2018) FIC proteins: from bacteria to humans and  
576 back again. *Pathog Dis* 76(2).
- 577 19. Stanger FV, *et al.* (2016) Intrinsic regulation of FIC-domain AMP-transferases by  
578 oligomerization and automodification. *Proceedings of the National Academy of*  
579 *Sciences of the United States of America* 113(5):E529-537.
- 580 20. Preissler S, Rato C, Perera LA, Saudek V, & Ron D (2017) FICD acts bifunctionally  
581 to AMPylate and de-AMPylylate the endoplasmic reticulum chaperone BiP. *Nat Struct*  
582 *Mol Biol* 24(1):23-29.
- 583 21. Hegstad K, Mikalsen T, Coque TM, Werner G, & Sundsfjord A (2010) Mobile genetic  
584 elements and their contribution to the emergence of antimicrobial resistant  
585 *Enterococcus faecalis* and *Enterococcus faecium*. *Clin Microbiol Infect* 16(6):541-554.
- 586 22. Lebreton F, *et al.* (2017) Tracing the Enterococci from Paleozoic Origins to the  
587 Hospital. *Cell* 169(5):849-861 e813.
- 588 23. Casey AK, *et al.* (2017) Fic-mediated deAMPylation is not dependent on  
589 homodimerization and rescues toxic AMPylation in flies. *The Journal of biological*  
590 *chemistry* 292(51):21193-21204.
- 591 24. Carafoli E & Krebs J (2016) Why Calcium? How Calcium Became the Best  
592 Communicator. *The Journal of biological chemistry* 291(40):20849-20857.
- 593 25. Hibbing ME, Fuqua C, Parsek MR, & Peterson SB (2010) Bacterial competition:  
594 surviving and thriving in the microbial jungle. *Nat Rev Microbiol* 8(1):15-25.
- 595 26. Krebs J, Agellon LB, & Michalak M (2015) Ca<sup>2+</sup> homeostasis and endoplasmic  
596 reticulum (ER) stress: An integrated view of calcium signaling. *Biochem Biophys Res*  
597 *Commun* 460(1):114-121.

- 598 27. Carreras-Sureda A, Pihan P, & Hetz C (2018) Calcium signaling at the endoplasmic  
599 reticulum: fine-tuning stress responses. *Cell Calcium* 70:24-31.
- 600 28. Kabsch W (2010) Integration, scaling, space-group assignment and post-refinement.  
601 *Acta crystallographica. Section D, Biological crystallography* 66(Pt 2):133-144.
- 602 29. Vonrhein C, *et al.* (2011) Data processing and analysis with the autoPROC toolbox.  
603 *Acta crystallographica. Section D, Biological crystallography* 67(Pt 4):293-302.
- 604 30. Adams PD, *et al.* (2010) PHENIX: a comprehensive Python-based system for  
605 macromolecular structure solution. *Acta crystallographica. Section D, Biological*  
606 *crystallography* 66(Pt 2):213-221.
- 607 31. Emsley P & Cowtan K (2004) Coot: model-building tools for molecular graphics.  
608 *Acta crystallographica. Section D, Biological crystallography* 60(Pt 12 Pt 1):2126-  
609 2132.
- 610 32. Morin A, *et al.* (2013) Collaboration gets the most out of software. *Elife* 2:e01456.  
611



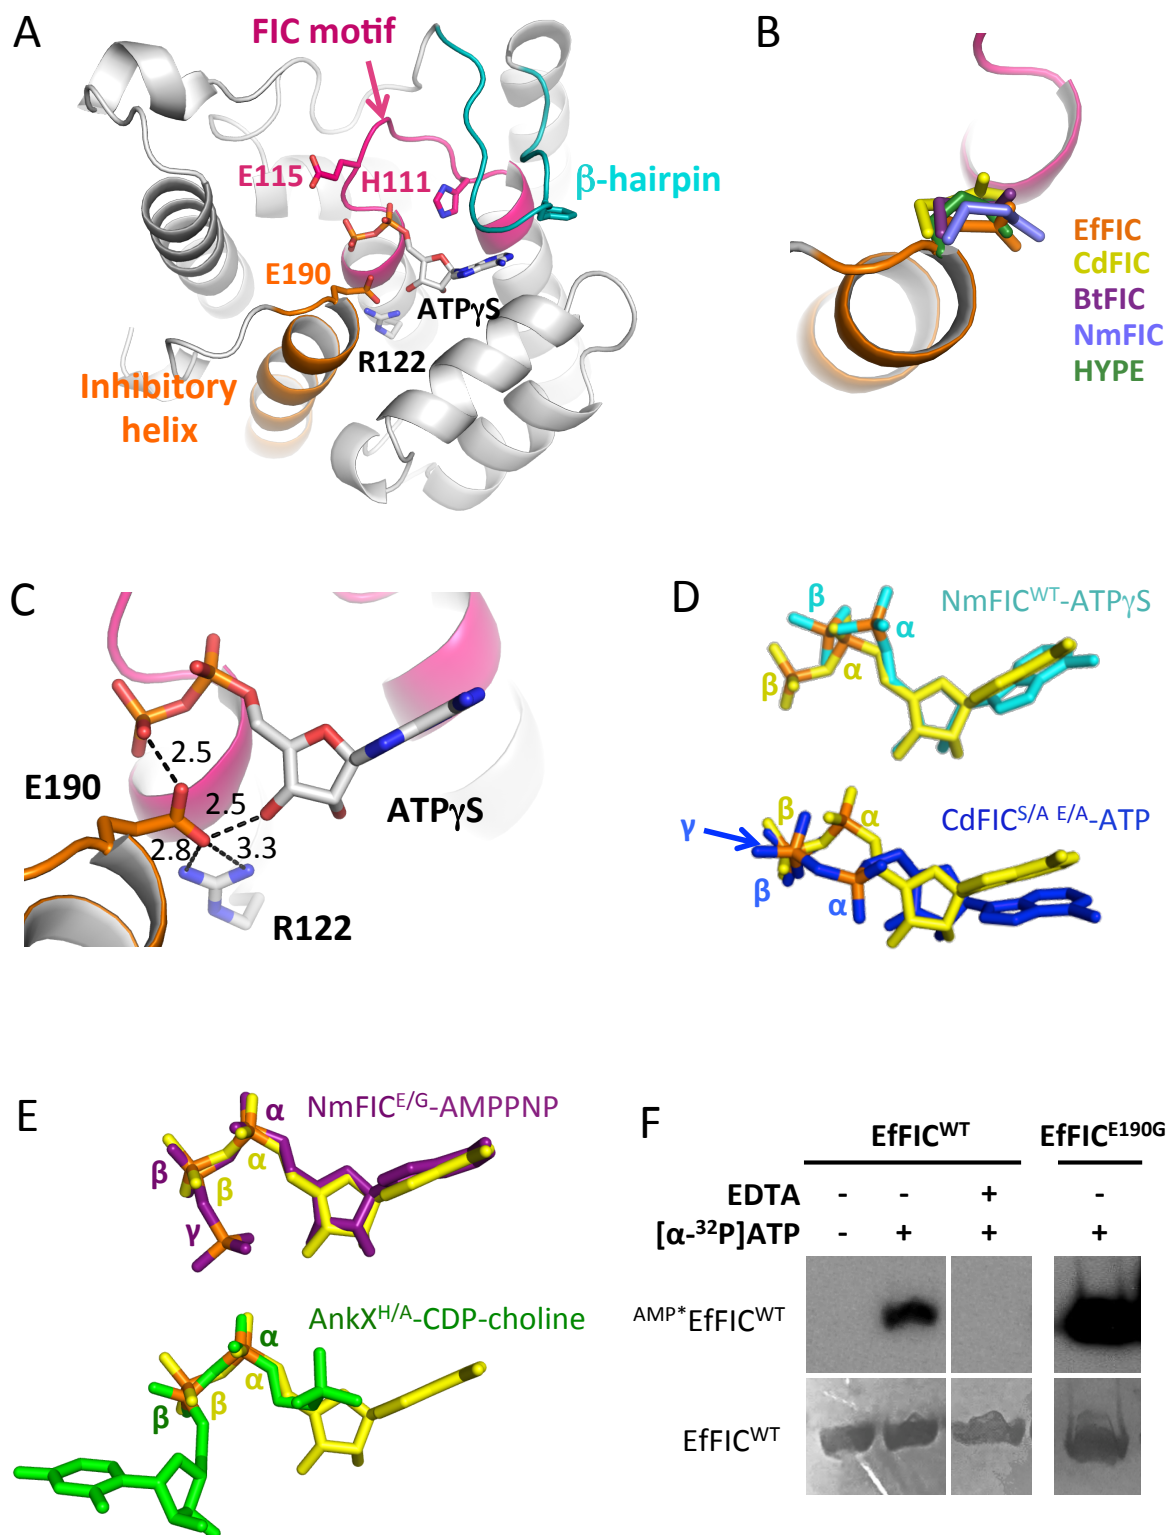

Figure 1

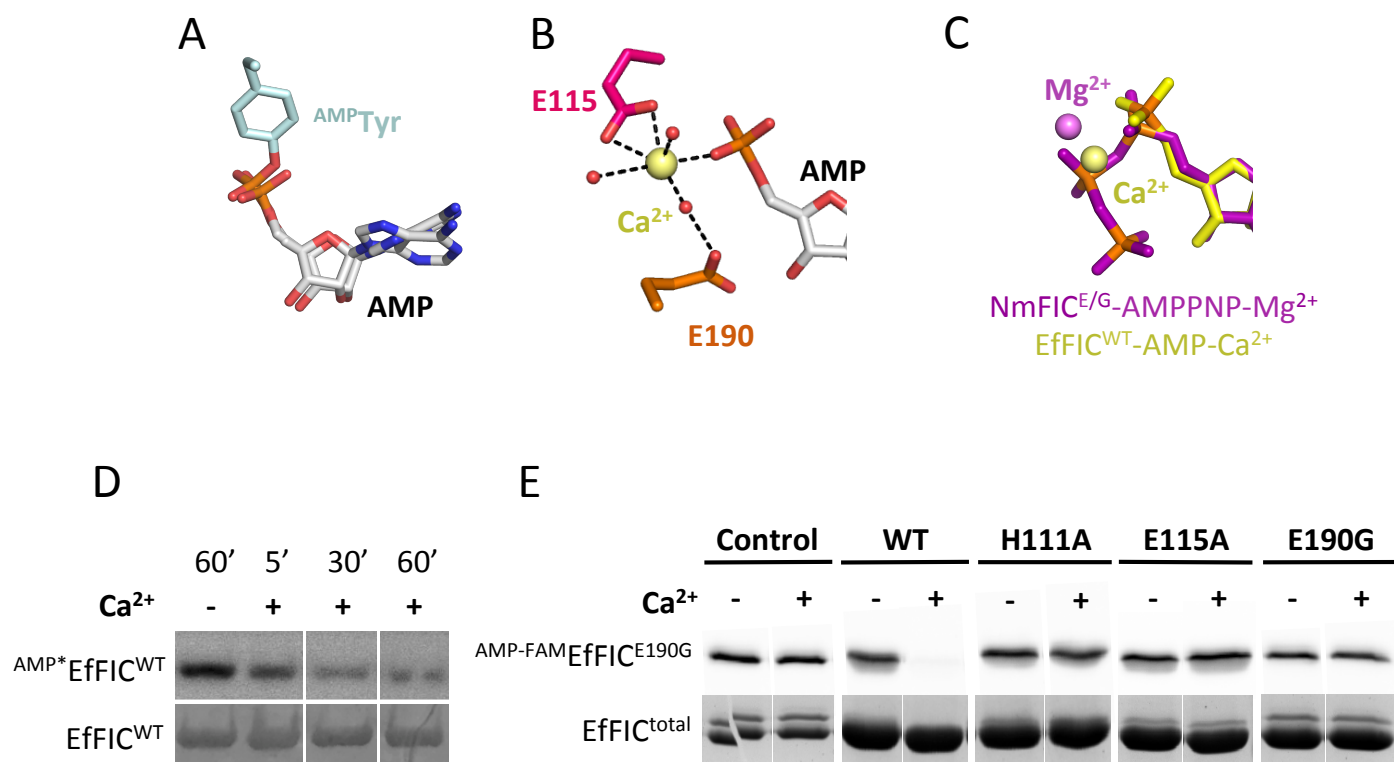

Figure 2

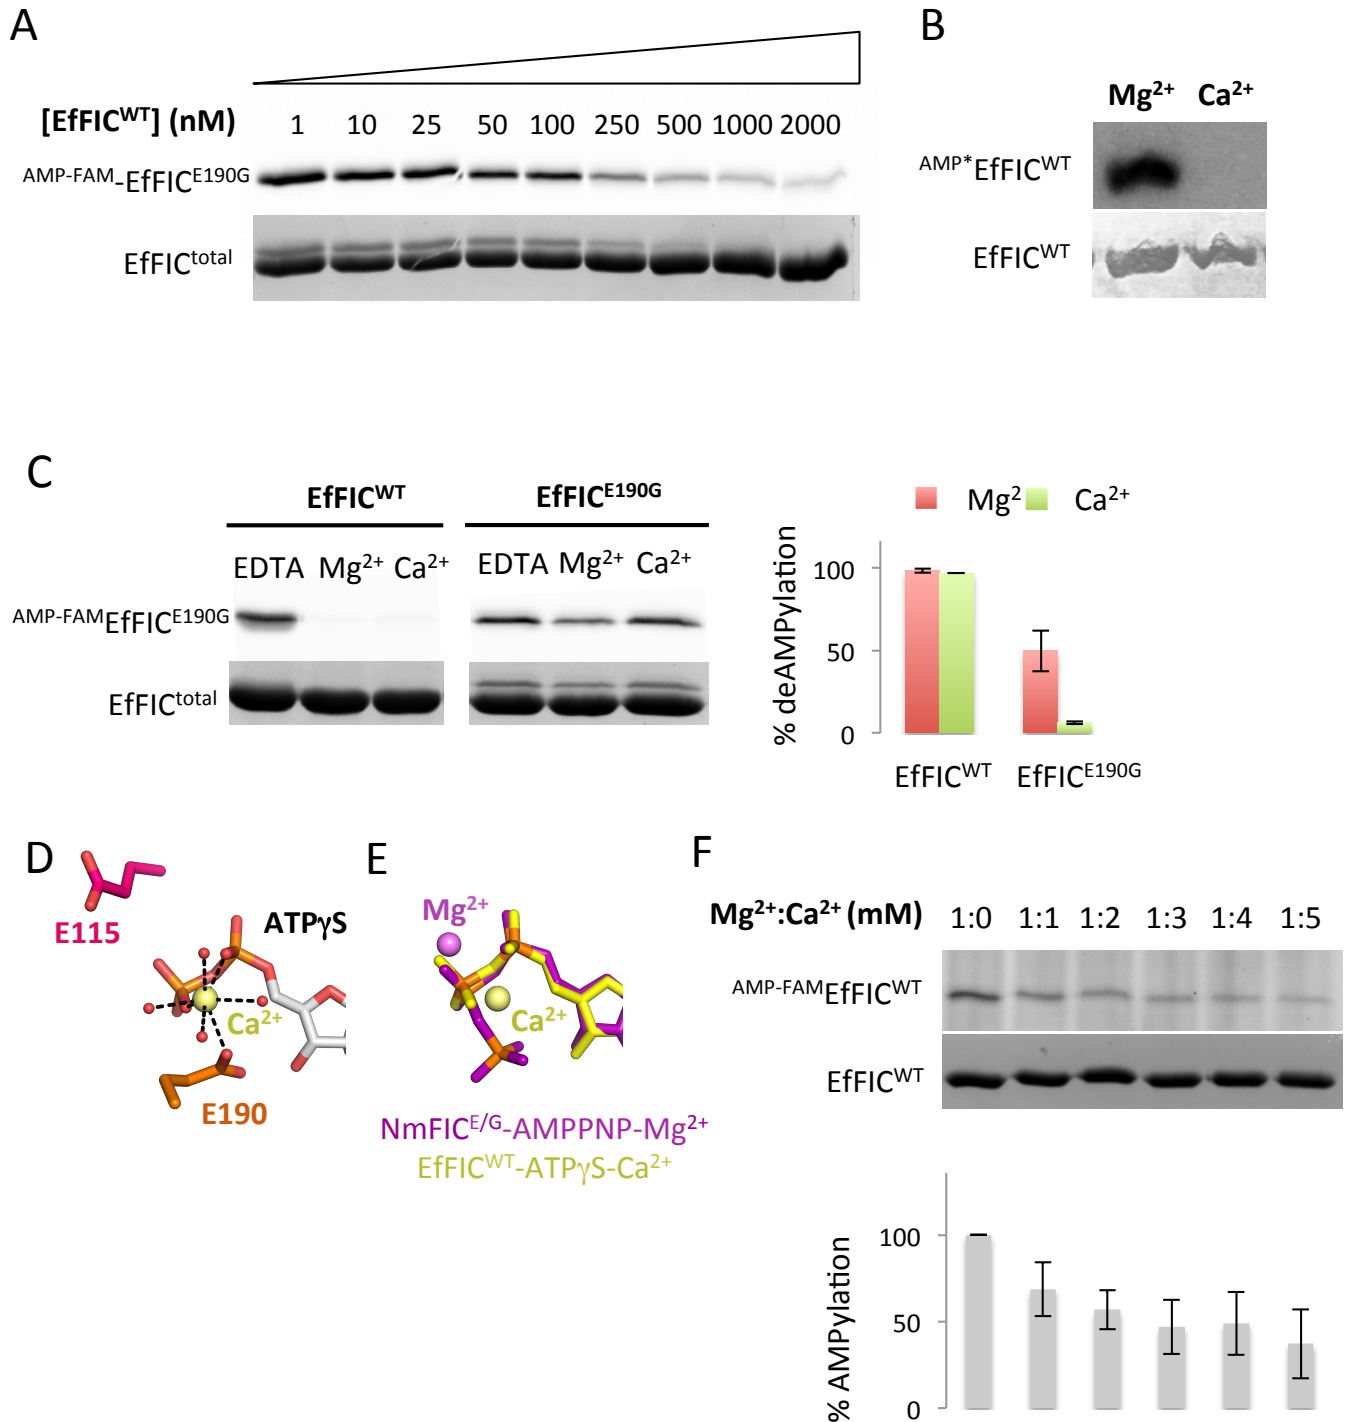

Figure 3

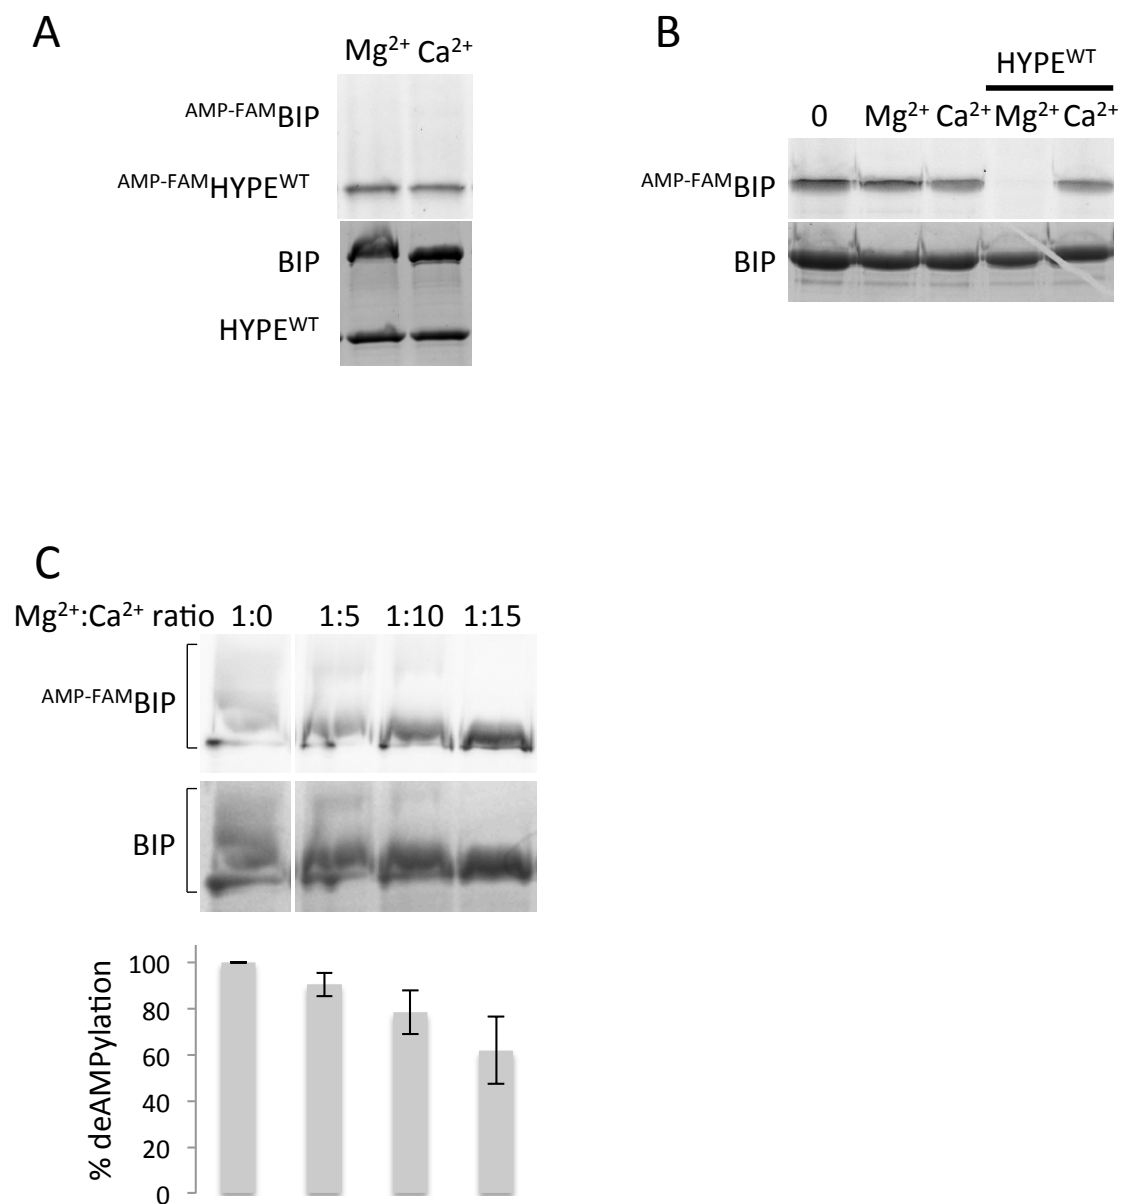

Figure 4

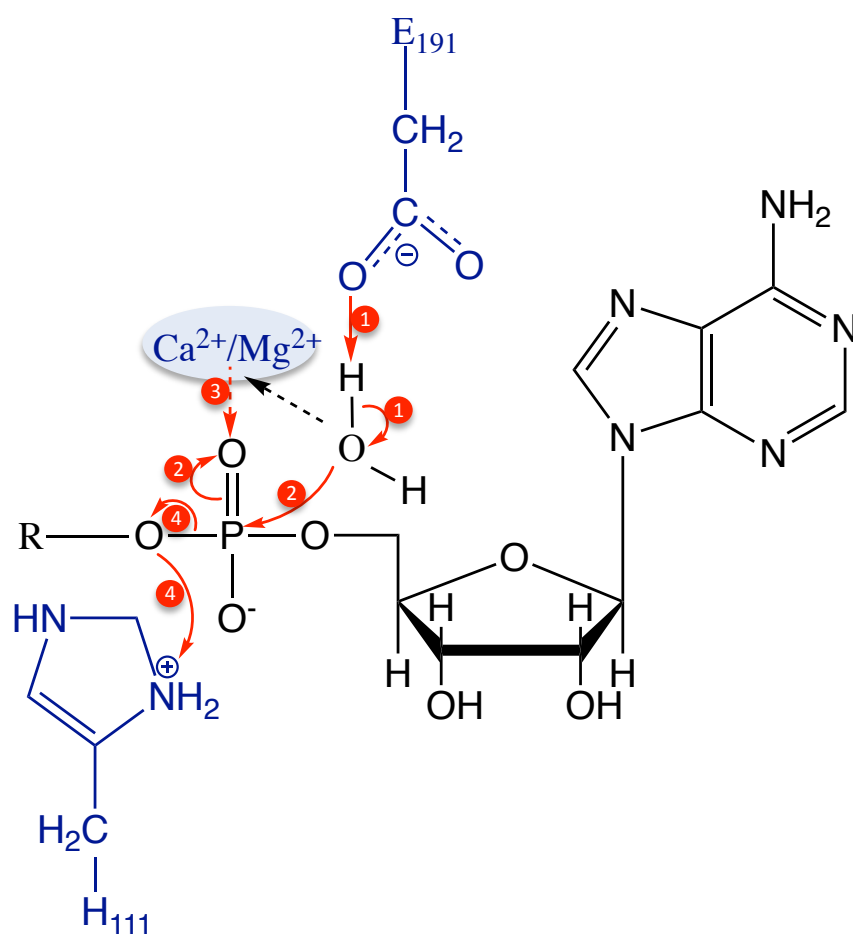

Figure 5
